# Supplementary figures and images for: Increasing the operating lifetime of green phosphorescent organic light emitting diodes by reducing charge accumulation at the interface
Source: Royal Society of Chemistry journal article supplement (doi:10.1039/d2cp05797b), 2023-01-01

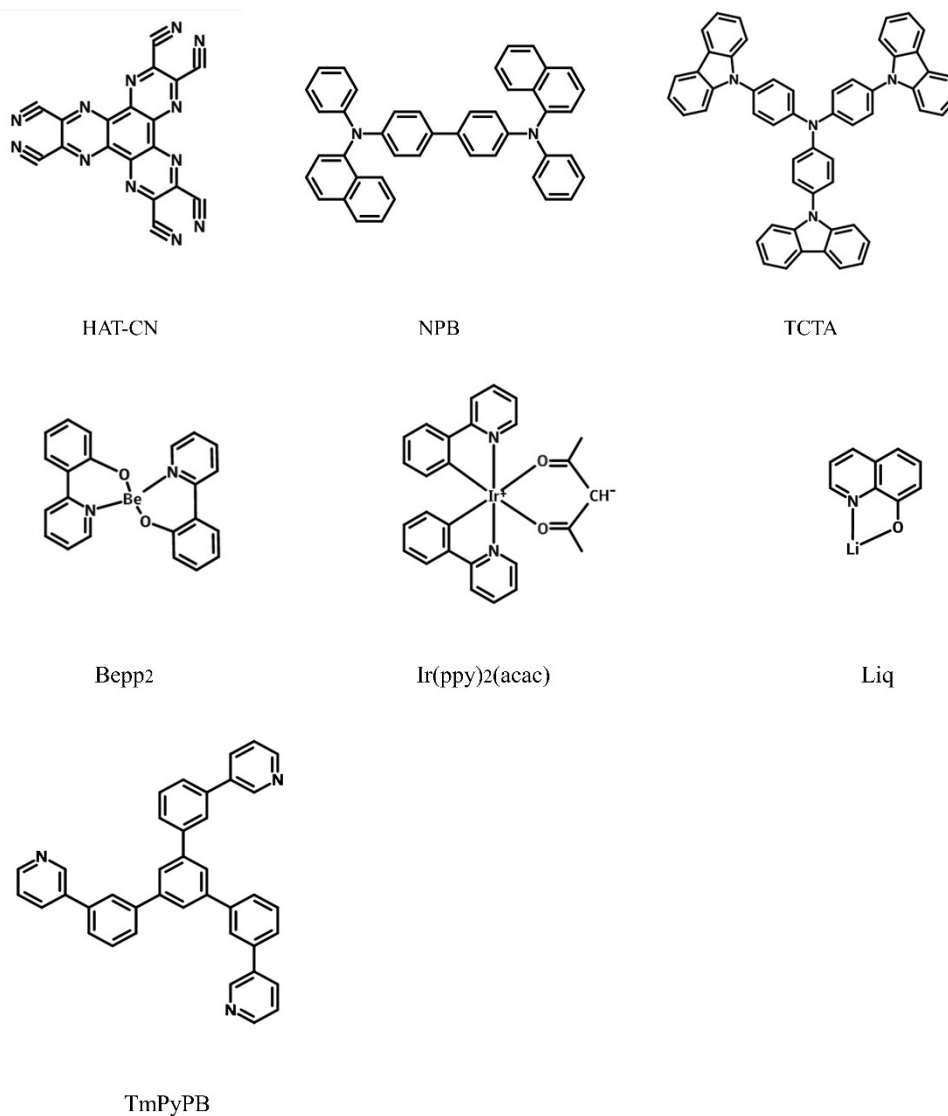

Fig. S1

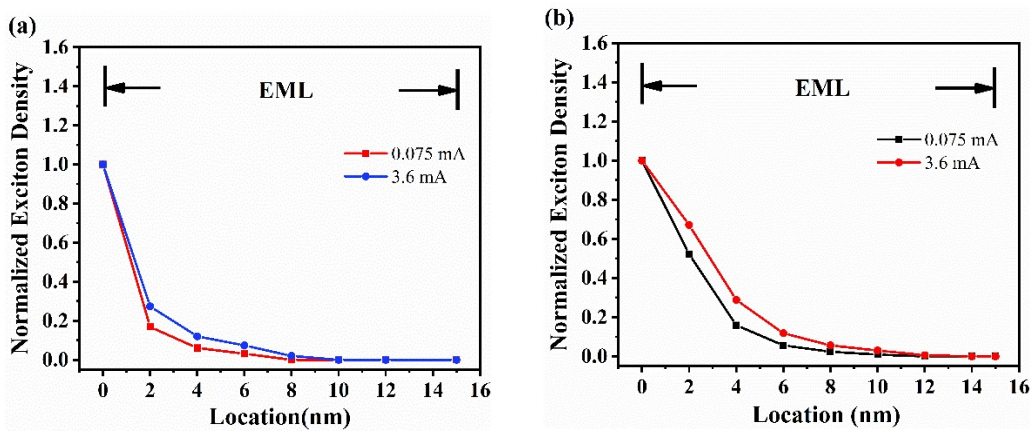

Fig. S2

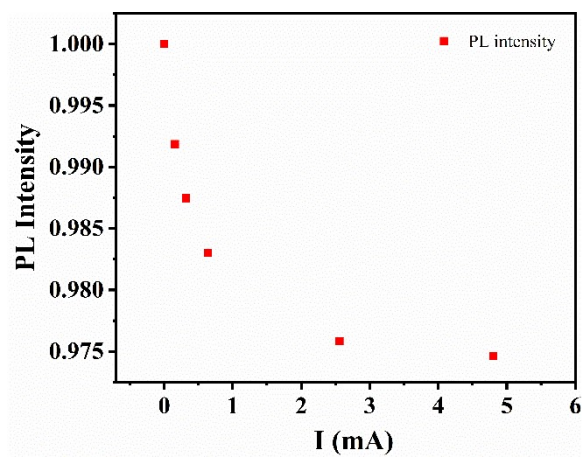

Fig. S3

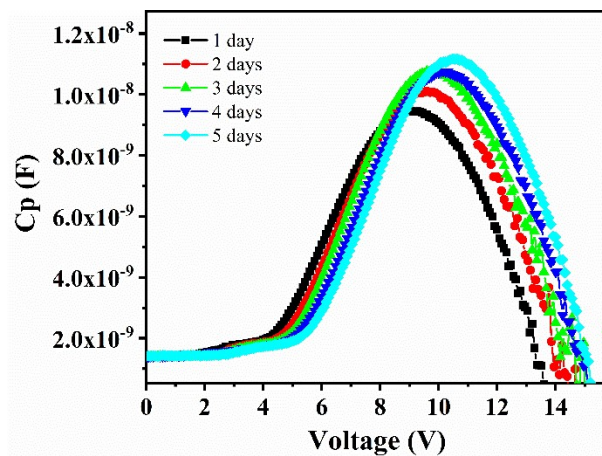

Fig. S4

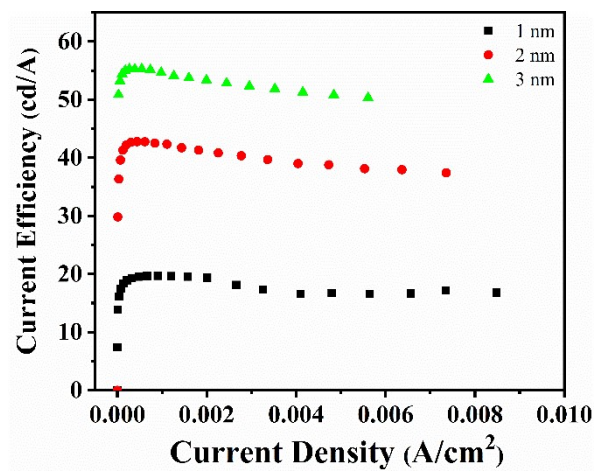

Fig. S5

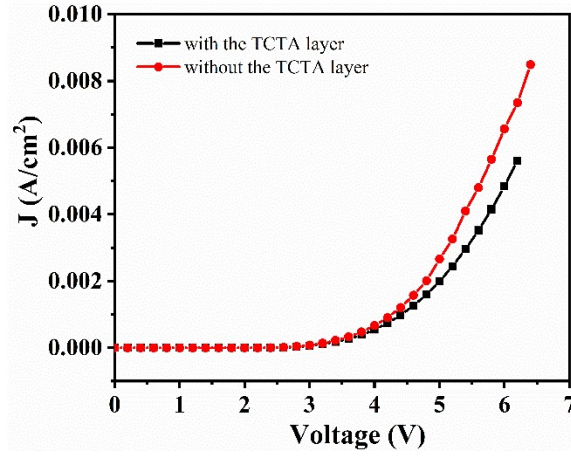

Fig. S6

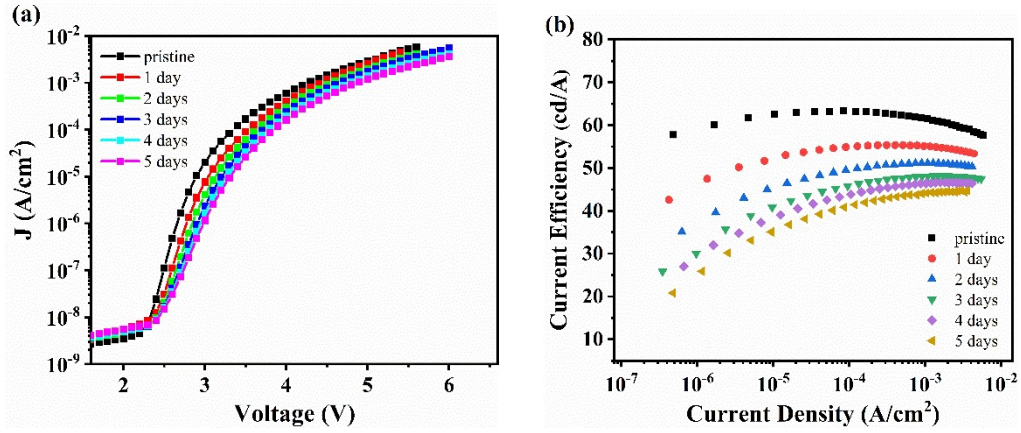

Fig. S7

Supplement: d2cp05797b1.pdf [file d2cp05797b1.pdf]
